# Supplementary material for: Correlated 5-Hydroxymethylcytosine (5hmC) and Gene Expression Profiles Underpin Gene and Organ-Specific Epigenetic Regulation in Adult Mouse Brain and Liver
Source: PLoS One. 2017 Jan 26;12(1):e0170779. doi: 10.1371/journal.pone.0170779 (PMC5268415; doi:10.1371/journal.pone.0170779)
Supplement: S1 Table — The sample names are abbreviated. F and M denote female and male samples respectively. Cb = cerebellum; Cx = cortex; Hi = hippocampus; Hy = hypothalamus; Th = thalamus; Lv = liver. (XLSX) [file pone.0170779.s005.xlsx]

## Sheet: S1 Table
S1 Table. 5hmC sequencing and mapping statistics of 12 mouse samples.
Sample ID	F.Cb	M.Cb	F.Cx	M.Cx	F.Hi	M.Hi	F.Hy	M.Hy	F.Th	M.Th	F.Lv	M.Lv
Age	3 months	3 months	3 months	3 months	3 months	3 months	4 month	4 month	4 month	4 month	3 months	3 months
Tissue	Brain	Brain	Brain	Brain	Brain	Brain	Brain	Brain	Brain	Brain	Liver	Liver
Region	Cerebellum	Cerebellum	Cortex	Cortex	Hippocampus	Hippocampus	Hypothalamus	Hypothalamus	Thalamus	Thalamus	-	-
Sex	Female	Male	Female	Male	Female	Male	Female	Male	Female	Male	Female	Male
No. of read pairs (fragments), captured	44770389	49550256	69537711	42985421	47095498	53227224	40789805	45805213	61422494	40026354	69958910	50674536
No. of read pairs (fragments), input DNA	52372348	60353121	55016683	50683779	58041822	52083637	66503345	58350493	89142880	57761611	51227113	55918973
Properly paried non-redundant read pairs, captured	34273173	39420337	55831103	34734777	38254004	39337494	33833853	38457468	48338190	31229113	46913917	23255015
Properly paried non-redundant read pairs, input DNA	38042410	43287719	38756359	36091682	41501649	36253902	45685091	40377295	59546751	35176673	38488432	41956121
Number of 5hmC peaks	204450	258831	313388	225403	269752	200574	260517	307510	253077	284639	172952	62392
Total 5hmC peak lengths (Mbp)	203.894	230.799	262.491	212.683	211.141	163.099	278.702	296.018	254.008	282.37	162.78	54.7149
Median 5hmC peak lengths (bp)	800	700	700	800	700	700	900	800	800	800	700	700
